# Supplementary material for: CD1b Tetramers Broadly Detect T Cells That Correlate With Mycobacterial Exposure but Not Tuberculosis Disease State
Source: PubMed Central journal article supplement (PMC7033476; doi:10.3389/fimmu.2020.00199), 2020-02-14
Supplement: Image_4.pdf [file Image_4.pdf]

## Supplementary Figure 4

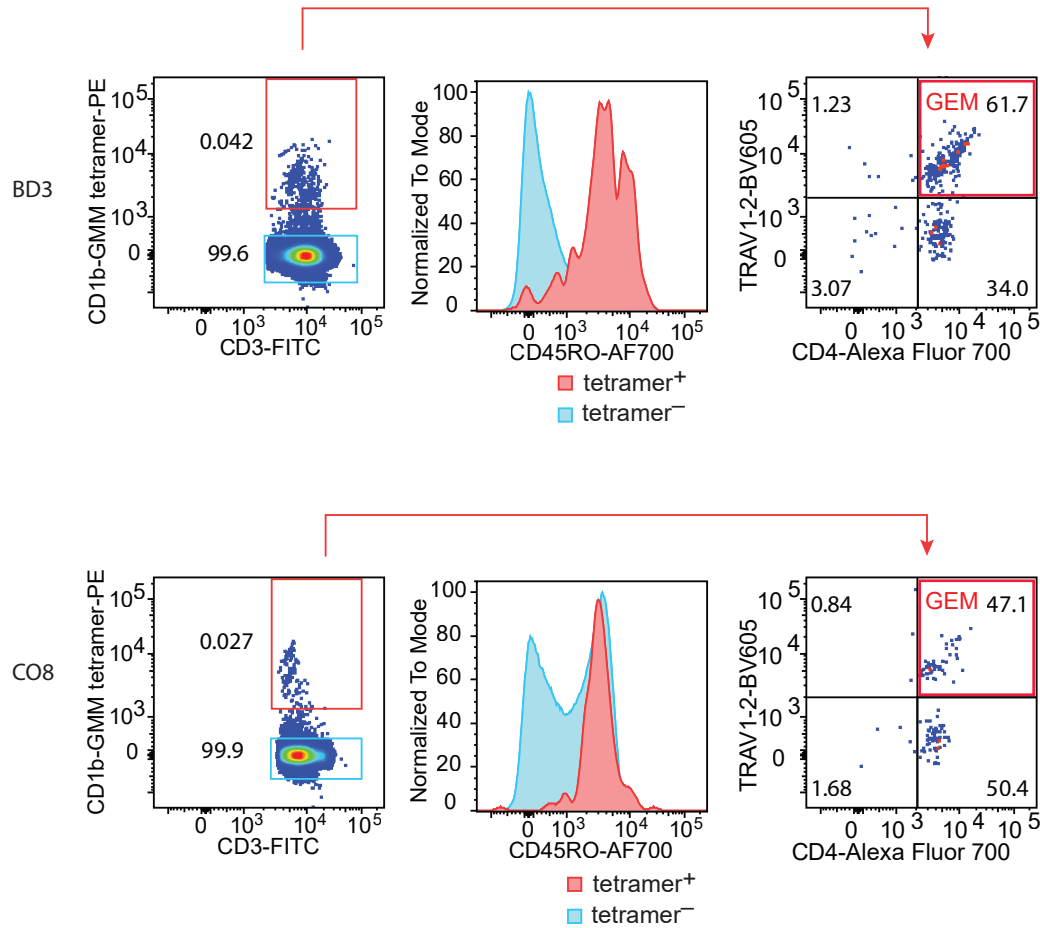

**Supplementary Figure 4.** Flow cytometry plots of CD45RO expression by CD1b tetramer<sup>+</sup> T cells and CD1b tetramer<sup>-</sup> T cells of two members of the Boston cohort that were selected for having among the highest CD1b-GMM tetramer<sup>+</sup> T cell frequencies.
