# Supplementary material for: CD1b Tetramers Broadly Detect T Cells That Correlate With Mycobacterial Exposure but Not Tuberculosis Disease State
Source: Front Immunol. 2020 Feb 14;11:199. doi: 10.3389/fimmu.2020.00199 (PMC7033476; doi:10.3389/fimmu.2020.00199)
Supplement: Supplementary file 2 [file Table_2.xlsx]

## Sheet: Sheet1
Supplementary Table 2
Ex vivo PBMC (48 latent; 42 active; 44 noninf) Experimental date	sample ID	status	phenotyping possible: low background and visible tetramer+ pop			Expanded T cells (50 latent; 48 active; 49 noninf) Experimental date	sample ID	status	>10 cells in CD1b-GMM+ gate
2017-06-01	LA2P-0004-3	active				2017-06-19	LA2P-0003-2	active	no
2017-09-22	LA2P-0010-5	active				2017-06-14	LA2P-0004-3	active	yes
2017-07-20	LA2P-0015-3	active	ma			2017-07-14	LA2P-0007-3	active	yes
2017-06-22	LA2P-0016-5	active				2017-09-13	LA2P-0010-5	active	yes
2017-07-19	LA2P-0022-2	active				2017-08-04	LA2P-0015-3	active	yes
2017-09-28	LA2P-0025-4	active	ma			2017-07-07	LA2P-0016-5	active	no
2017-09-29	LA2P-0028-0	active	ma			2017-08-09	LA2P-0019-7	active	no
2017-07-11	LA2P-0031-8	active				2017-08-03	LA2P-0022-2	active	yes
2017-06-13	LA2P-0034-7	active				2017-07-12	LA2P-0025-4	active	yes
2017-06-20	LA2P-0037-8	active				2017-07-06	LA2P-0028-0	active	yes
2017-06-08	LA2P-0041-7	active	ma			2017-07-26	LA2P-0031-8	active	yes
2017-09-21	LA2P-0042-3	active				2017-06-26	LA2P-0034-7	active	no
2017-07-18	LA2P-0045-6	active				2017-07-05	LA2P-0037-8	active	yes
2017-07-13	LA2P-0048-5	active				2017-06-21	LA2P-0041-7	active	no
2017-10-03	LA2P-0057-1	active				2017-06-12	LA2P-0042-3	active	yes
2017-10-04	LA2P-0063-1	active				2017-08-02	LA2P-0045-6	active	yes
2017-06-14	LA2P-0066-1	active				2017-07-27	LA2P-0048-5	active	yes
2017-05-26	LA2P-0069-9	active	ma			2017-08-10	LA2P-0053-0	active	no
2017-05-19	LA2P-0074-6	active				2017-08-23	LA2P-0054-1	active	no
2017-09-27	LA2P-0076-4	active		gmm		2017-08-24	LA2P-0057-1	active	yes
2017-06-15	LA2P-0078-5	active				2017-08-17	LA2P-0062-1	active	yes
2017-10-05	LA2P-0081-1	active				2017-08-30	LA2P-0063-1	active	yes
2017-10-06	LA2P-0087-4	active				2017-06-29	LA2P-0066-1	active	yes
2017-05-24	LA2P-0090-9	active				2017-06-08	LA2P-0069-9	active	yes
2017-10-12	LA2P-0095-4	active	ma			2017-06-06	LA2P-0074-6	active	yes
2017-07-07	LA2P-0096-5	active				2017-06-23	LA2P-0076-4	active	yes
2017-07-10	LA2P-0099-2	active				2017-06-30	LA2P-0078-5	active	yes
2017-12-06	LA2P-0104-1	active				2017-08-31	LA2P-0081-1	active	yes
2017-11-01	LA2P-0109-8	active	ma			2017-09-06	LA2P-0087-4	active	yes
2017-10-13	LA2P-0111-2	active	ma			2017-06-07	LA2P-0090-9	active	yes
2017-10-18	LA2P-0115-7	active				2017-09-07	LA2P-0095-4	active	yes
2017-11-15	LA2P-0120-2	active		gmm		2017-11-20	LA2P-0096-5	active	no
2017-11-20	LA2P-0128-2	active				2017-11-20	LA2P-0099-2	active	no
2017-11-08	LA2P-0131-1	active	ma			2017-12-20	LA2P-0104-1	active	no
2017-10-19	LA2P-0137-8	active				2017-11-15	LA2P-0109-8	active	yes
2017-11-30	LA2P-0141-5	active				2017-09-08	LA2P-0111-2	active	yes
2017-10-20	LA2P-0148-2	active				2017-08-29	LA2P-0115-7	active	yes
2017-11-16	LA2P-0156-7	active				2017-11-29	LA2P-0120-2	active	yes
2017-11-29	LA2P-0157-5	active				2017-12-04	LA2P-0128-2	active	yes
2017-12-07	LA2P-0189-7	active				2017-11-22	LA2P-0131-1	active	no
2017-11-21	LA2P-0192-0	active				2017-11-02	LA2P-0137-8	active	no
2017-09-20	LA2P-0200-7	active				2017-12-14	LA2P-0141-5	active	yes
2017-11-15	LA3P-0004-3	noninfected				2017-08-28	LA2P-0148-2	active	yes
2017-12-06	LA3P-0015-3	noninfected		gmm		2017-12-01	LA2P-0156-7	active	no
2017-10-19	LA3P-0018-8	noninfected				2017-12-13	LA2P-0157-5	active	no
2017-11-20	LA3P-0024-6	noninfected				2017-12-21	LA2P-0189-7	active	yes
2017-06-21	LA3P-0039-9	noninfected				2017-12-06	LA2P-0192-0	active	yes
2017-09-22	LA3P-0041-7	noninfected				2017-09-14	LA2P-0200-7	active	yes
2017-10-03	LA3P-0043-8	noninfected		gmm		2017-12-12	LA3P-0001-2	latent	yes
2017-09-20	LA3P-0045-6	noninfected				2017-08-09	LA3P-0006-8	latent	yes
2017-10-04	LA3P-0050-5	noninfected	ma			2017-08-18	LA3P-0007-3	latent	yes
2017-11-01	LA3P-0056-4	noninfected	ma	gmm		2017-12-14	LA3P-0009-9	latent	no
2017-11-09	LA3P-0060-2	noninfected				2017-09-06	LA3P-0013-3	latent	yes
2017-10-05	LA3P-0061-2	noninfected				2017-08-28	LA3P-0020-0	latent	yes
2017-07-19	LA3P-0065-5	noninfected				2017-11-29	LA3P-0022-2	latent	yes
2017-06-08	LA3P-0067-4	noninfected	ma			2017-06-12	LA3P-0026-5	latent	no
2017-09-29	LA3P-0069-9	noninfected				2017-07-14	LA3P-0027-2	latent	yes
2017-06-15	LA3P-0075-5	noninfected				2017-09-14	LA3P-0029-5	latent	yes
2017-11-28	LA3P-0077-0	noninfected				2017-09-07	LA3P-0033-8	latent	yes
2017-07-10	LA3P-0079-1	noninfected				2017-06-21	LA3P-0035-9	latent	yes
2017-10-06	LA3P-0089-9	noninfected				2017-06-23	LA3P-0037-8	latent	yes
2017-11-21	LA3P-0091-5	noninfected				2017-08-29	LA3P-0048-5	latent	yes
2017-07-07	LA3P-0093-7	noninfected	ma			2017-08-10	LA3P-0054-1	latent	yes
2017-05-19	LA3P-0099-2	noninfected				2017-06-06	LA3P-0058-1	latent	yes
2017-10-26	LA3P-0107-5	noninfected				2017-06-08	LA3P-0063-1	latent	no
2017-06-28	LA3P-0113-0	noninfected				2017-08-04	LA3P-0071-1	latent	yes
2017-07-20	LA3P-0115-7	noninfected				2017-09-12	LA3P-0073-6	latent	yes
2017-07-11	LA3P-0121-8	noninfected	ma			2017-06-26	LA3P-0082-5	latent	yes
2017-06-14	LA3P-0127-8	noninfected				2017-07-26	LA3P-0084-1	latent	yes
2017-10-12	LA3P-0131-1	noninfected	ma			2017-11-22	LA3P-0086-8	latent	yes
2017-06-13	LA3P-0135-8	noninfected		gmm		2017-06-29	LA3P-0087-4	latent	yes
2017-09-27	LA3P-0138-4	noninfected				2017-12-06	LA3P-0095-4	latent	yes
2017-10-18	LA3P-0140-6	noninfected				2017-06-19	LA3P-0097-5	latent	yes
2017-11-29	LA3P-0144-6	noninfected				2017-07-25	LA3P-0103-8	latent	no
2017-11-16	LA3P-0145-5	noninfected				2017-08-02	LA3P-0106-1	latent	yes
2017-11-09	LA3P-0149-4	noninfected				2017-08-24	LA3P-0109-8	latent	yes
2017-11-09	LA3P-0151-9	noninfected				2017-09-13	LA3P-0111-2	latent	yes
2017-11-30	LA3P-0153-0	noninfected				2017-11-02	LA3P-0117-6	latent	no
2017-10-13	LA3P-0161-3	noninfected				2017-08-17	LA3P-0120-2	latent	yes
2017-10-20	LA3P-0175-1	noninfected				2017-06-30	LA3P-0123-9	latent	yes
2017-05-26	LA3P-0193-1	noninfected				2017-06-14	LA3P-0125-3	latent	yes
2017-10-25	LA3P-0195-4	noninfected	ma	gmm		2017-08-23	LA3P-0129-5	latent	no
2017-06-20	LA3P-0197-0	noninfected				2017-12-20	LA3P-0141-5	latent	no
2017-05-31	LA3P-0204-9	noninfected				2017-07-06	LA3P-0147-4	latent	yes
2017-07-18	LA3P-0228-1	noninfected				2017-11-15	LA3P-0164-3	latent	no
2017-05-24	LA3P-0230-1	noninfected				2017-12-21	LA3P-0166-3	latent	no
2017-11-28	LA3P-0001-2	latent	ma	gmm		2017-12-01	LA3P-0168-8	latent	no
2017-10-03	LA3P-0006-8	latent				2017-08-30	LA3P-0173-3	latent	yes
2017-10-05	LA3P-0007-3	latent	ma			2017-07-21	LA3P-0177-4	latent	yes
2017-11-30	LA3P-0009-9	latent				2017-12-21	LA3P-0179-8	latent	yes
2017-09-27	LA3P-0013-3	latent				2017-08-03	LA3P-0181-0	latent	yes
2017-09-29	LA3P-0020-0	latent		gmm		2017-06-07	LA3P-0183-1	latent	yes
2017-11-15	LA3P-0022-2	latent	ma			2017-07-05	LA3P-0185-0	latent	yes
2017-09-28	LA3P-0026-5	latent				2017-12-04	LA3P-0188-6	latent	no
2017-10-04	LA3P-0029-5	latent				2017-12-13	LA3P-0190-1	latent	yes
2017-10-06	LA3P-0033-8	latent		gmm		2017-08-31	LA3P-0199-5	latent	yes
2017-11-09	LA3P-0035-9	latent	ma	gmm		2017-07-12	LA3P-0202-0	latent	yes
2017-06-09	LA3P-0037-8	latent		gmm		2017-11-22	LA3P-0206-0	latent	no
2017-10-26	LA3P-0048-5	latent				2017-11-29	LA3P-0004-3	noninfected	yes
2017-05-19	LA3P-0058-1	latent		gmm		2017-08-17	LA3P-0012-0	noninfected	yes
2017-05-26	LA3P-0063-1	latent				2017-12-20	LA3P-0015-3	noninfected	no
2017-07-20	LA3P-0071-1	latent				2017-11-02	LA3P-0018-8	noninfected	yes
2017-09-22	LA3P-0073-6	latent				2017-12-04	LA3P-0024-6	noninfected	yes
2017-06-13	LA3P-0082-5	latent		gmm		2017-07-06	LA3P-0039-9	noninfected	yes
2017-07-11	LA3P-0084-1	latent				2017-09-06	LA3P-0041-7	noninfected	yes
2017-11-08	LA3P-0086-8	latent	ma			2017-06-23	LA3P-0043-8	noninfected	yes
2017-06-14	LA3P-0087-4	latent				2017-06-14	LA3P-0045-6	noninfected	yes
2017-11-21	LA3P-0095-4	latent				2017-07-07	LA3P-0050-5	noninfected	yes
2017-10-12	LA3P-0097-5	latent		gmm		2017-08-10	LA3P-0051-5	noninfected	yes
2017-07-10	LA3P-0103-8	latent	ma			2017-11-15	LA3P-0056-4	noninfected	no
2017-07-18	LA3P-0106-1	latent				2017-08-24	LA3P-0060-2	noninfected	yes
2017-10-13	LA3P-0109-8	latent	ma			2017-06-19	LA3P-0061-2	noninfected	yes
2017-09-20	LA3P-0111-2	latent	ma			2017-08-03	LA3P-0065-5	noninfected	yes
2017-10-19	LA3P-0117-6	latent				2017-06-21	LA3P-0067-4	noninfected	yes
2017-10-25	LA3P-0120-2	latent				2017-09-08	LA3P-0069-9	noninfected	yes
2017-06-15	LA3P-0123-9	latent				2017-06-30	LA3P-0075-5	noninfected	yes
2017-06-01	LA3P-0125-3	latent		gmm		2017-12-12	LA3P-0077-0	noninfected	yes
2017-10-20	LA3P-0129-5	latent				2017-07-25	LA3P-0079-1	noninfected	no
2017-12-06	LA3P-0141-5	latent				2017-08-30	LA3P-0089-9	noninfected	yes
2017-06-21	LA3P-0147-4	latent	ma			2017-12-06	LA3P-0091-5	noninfected	yes
2017-11-01	LA3P-0164-3	latent	ma			2017-07-21	LA3P-0093-7	noninfected	yes
2017-12-07	LA3P-0166-3	latent	ma			2017-06-06	LA3P-0099-2	noninfected	yes
2017-11-16	LA3P-0168-8	latent	ma			2017-08-18	LA3P-0101-2	noninfected	yes
2017-10-18	LA3P-0173-3	latent				2017-07-27	LA3P-0107-5	noninfected	yes
2017-07-07	LA3P-0177-4	latent				2017-07-12	LA3P-0113-0	noninfected	yes
2017-12-07	LA3P-0179-8	latent				2017-08-04	LA3P-0115-7	noninfected	yes
2017-07-19	LA3P-0181-0	latent				2017-07-26	LA3P-0121-8	noninfected	yes
2017-05-24	LA3P-0183-1	latent		gmm		2017-06-29	LA3P-0127-8	noninfected	yes
2017-06-20	LA3P-0185-0	latent	ma			2017-08-31	LA3P-0131-1	noninfected	yes
2017-11-20	LA3P-0188-6	latent		gmm		2017-09-12	LA3P-0133-6	noninfected	yes
2017-11-29	LA3P-0190-1	latent				2017-06-26	LA3P-0135-8	noninfected	yes
2017-10-25	LA3P-0199-5	latent	ma			2017-09-14	LA3P-0138-4	noninfected	yes
2017-06-28	LA3P-0202-0	latent				2017-07-07	LA3P-0140-6	noninfected	no
2017-11-08	LA3P-0206-0	latent		gmm		2017-12-13	LA3P-0144-6	noninfected	no
						2017-12-01	LA3P-0145-5	noninfected	yes
		phenotyped (Fig. 4b)	30	19		2017-08-29	LA3P-0149-4	noninfected	no
						2017-09-07	LA3P-0151-9	noninfected	yes
						2017-12-14	LA3P-0153-0	noninfected	yes
						2017-08-09	LA3P-0155-9	noninfected	yes
						2017-09-13	LA3P-0161-3	noninfected	yes
						2017-08-28	LA3P-0175-1	noninfected	yes
						2017-06-08	LA3P-0193-1	noninfected	yes
						2017-08-23	LA3P-0195-4	noninfected	yes
						2017-07-05	LA3P-0197-0	noninfected	yes
						2017-07-14	LA3P-0204-9	noninfected	yes
						2017-08-02	LA3P-0228-1	noninfected	yes
						2017-06-07	LA3P-0230-1	noninfected	yes
								phenotyped active (Fig. 3b)	34
								phenotyped latent (Fig. 3b)	38
								phenotyped noninfected (Fig. 3b)	43
