# Supplementary material for: CD1b Tetramers Broadly Detect T Cells That Correlate With Mycobacterial Exposure but Not Tuberculosis Disease State
Source: PubMed Central journal article supplement (PMC7033476; doi:10.3389/fimmu.2020.00199), 2020-02-14
Supplement: Table_1.pdf [file Table_1.pdf]

**Supplementary Table 1: List of flow cytometry antibodies for ex vivo PBMC (A) and expanded T cells (B)**

A)

| Fluorochrome         | Antigen       | Clone  | Catalogue no. | Supplier         |
|----------------------|---------------|--------|---------------|------------------|
| AlexaFluor350        | Viability     | NA     | L23105        | Molecular Probes |
| PE                   | CD1b tetramer | NA     | NA            | NIH              |
| FITC                 | CD3           | SK7    | 340542        | BD               |
| Brilliant Violet 605 | TRAV1-2       | 3C10   | 351720        | Biolegend        |
| APC-Cy7              | CD4           | RPA-T4 | 557871        | BD               |
| AlexaFluor700        | CD45RO        | UCHL1  | 561136        | BD               |

B)

| Fluorochrome         | Antigen       | Clone  | Catalogue no. | Supplier  |
|----------------------|---------------|--------|---------------|-----------|
| BV421                | CD3           | UCHT1  | 300434        | Biolegend |
| AlexaFluor700        | CD4           | RPA-T4 | 300526        | Biolegend |
| Brilliant Violet 605 | TRAV1-2       | 3C10   | 351720        | Biolegend |
| APC                  | TRBV4-1       | REA871 | 130-114-242   | Miltenyi  |
| PE                   | CD1b tetramer | NA     | NA            | NIH       |
